# Supplementary material
Source: Springer Nature journal article supplement (https://www.springermedizin.de/resource/supplementary/13058_2012_2972_MOESM3_ESM.pdf/9703002)

**ER**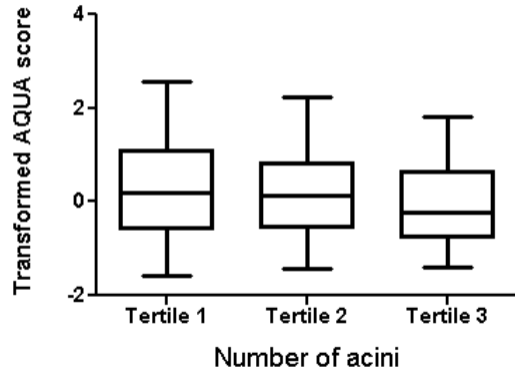**PR**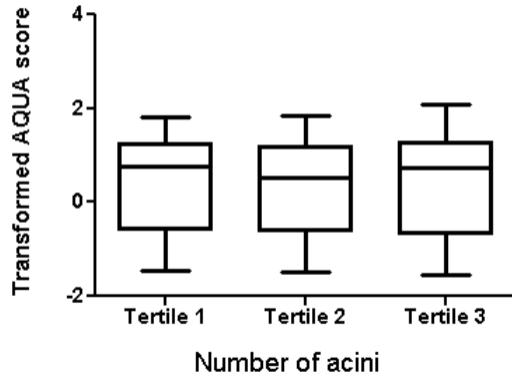**EGFR**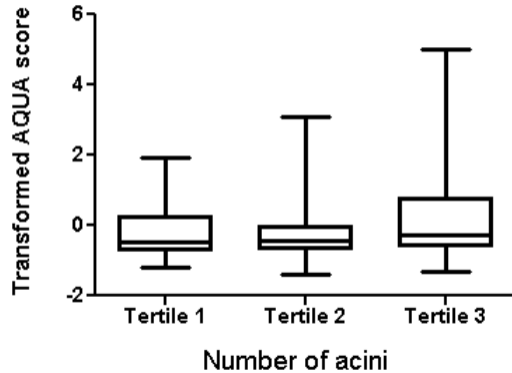

Supplement: MOESM3 [file 9703002]
